# Supplementary material for: Intrahaplotypic Variants Differentiate Complex Linkage Disequilibrium within Human MHC Haplotypes
Source: PubMed Central journal article supplement (PMC4655331; doi:10.1038/srep16972), 2015-11-23
Supplement: srep16972-s1.pdf [file srep16972-s1.pdf]

## Intrahaplotypic Variants Differentiate Complex Linkage Disequilibrium within Human MHC Haplotypes

Tze Hau Lam<sup>1,2</sup> Matthew Zirui Tay<sup>1,3</sup>, Bei Wang<sup>1</sup>, Ziwei Xiao<sup>1</sup>, Ee Chee Ren<sup>1,2\*</sup>

### Supplementary Figure Legends:

**Figure S1.** SNP alignment of independent A33-B58-DR3 and A2-B46-DR9 chromosomes with consensus SNPs sequence of each haplotype. Green columns indicate SNP alleles identical to the consensus sequence while dark green columns indicate otherwise.

**Figure S2.** Sequencing coverage and no-call rate across chr6:25.0 – 35.0(Mb). No-call and coverage profile for each cell line across the MHC region. The average GC-corrected coverage and the no-call counts were binned into non-overlapping 20-kb windows.

**Figure S3.** Zygosity profile of variants derived from CG sequencing. The region chr6: 25Mb–35Mb was binned into non-overlapping windows of 20 kb. The number of homozygous and heterozygous variants with respect to the NCBI Build 37.2 reference sequence was calculated in each bin. For each of the six individuals, the upper panel plot represents the homozygous variants counts while the lower panel plot represents the heterozygous variants counts across the region of interest.

**Figure S4.** Spikes in intra-CEH variations in the **(A)** A2-B46-DR9 haplotype and **(B)** A33-B58-DR3 haplotype. The variation counts were binned into non-overlapping 2-kb windows. Heightened intra-CEH variation in genomic segments extended to 120 kb and 240 kb were identified in the A2-B46-DR9 and A33-B58-DR3 haplotype, respectively.

**Figure S5.** Alignment of B58AL DNA templates derived via TA cloning. The DNA template was mapped to NCBI Build 37.2 reference sequence chr6:29,912,732–29,913,130 located within the HLA-A gene. The derived DNA sequences were also aligned with the sequence of the A\*33:03 allele downloaded from IMGT/HLA database (<http://www.ebi.ac.uk/ipd/imgt/hla/>, Release 3.13.1).

**Figure S6.** Alignment of B58SC DNA templates derived via TA cloning. The DNA template was mapped to NCBI Build 37.2 reference sequence chr6:29,912,732–29,913,130 located within the HLA-A gene. The derived DNA sequences were also aligned with the sequence of the A\*33:03 allele downloaded from IMGT/HLA database (<http://www.ebi.ac.uk/ipd/imgt/hla/>, Release 3.13.1).

**Figure S7.** Alignment of B58CF DNA templates derived via TA cloning. The DNA template was mapped to NCBI Build 37.2 reference sequence chr6:29,912,732–29,913,130 located within the HLA-A gene. The derived DNA sequences were also aligned with the sequence of the A\*33:03 allele downloaded from IMGT/HLA database (<http://www.ebi.ac.uk/ipd/imgt/hla/>, Release 3.13.1).

**Figure S8.** Variant counts between pairwise sequence comparisons of B46BM, B46CM, and B46ZS with the A33-B58-DR3 haploid sequence. A sliding window of 1 kb in length was used to analyse nucleotide differences between the sequences in the MHC region of chr6:29.60–29.69(Mb).

**Figure S9.** Intra-CEH variants overlapping with H3K4me1 peaks and their respective allele-specific luciferase activity. **(A)** H3K4me1 levels at the genomic location of the intra-CEH variants. The H3K4me1 level at these sites are referenced from the B-LCL cell line GM12878 from the ENCODE data. **(B)** Luciferase activity for each allele of intra-CEH variants. Reporter plasmids carrying the fragment sequence of each unique allele of a certain variant were co-transfected with Renilla control vector into HT1080 cells. The luciferase activity readout was normalized to Renilla luciferase, and the representative results from three independent experiments are shown.

Figure S1

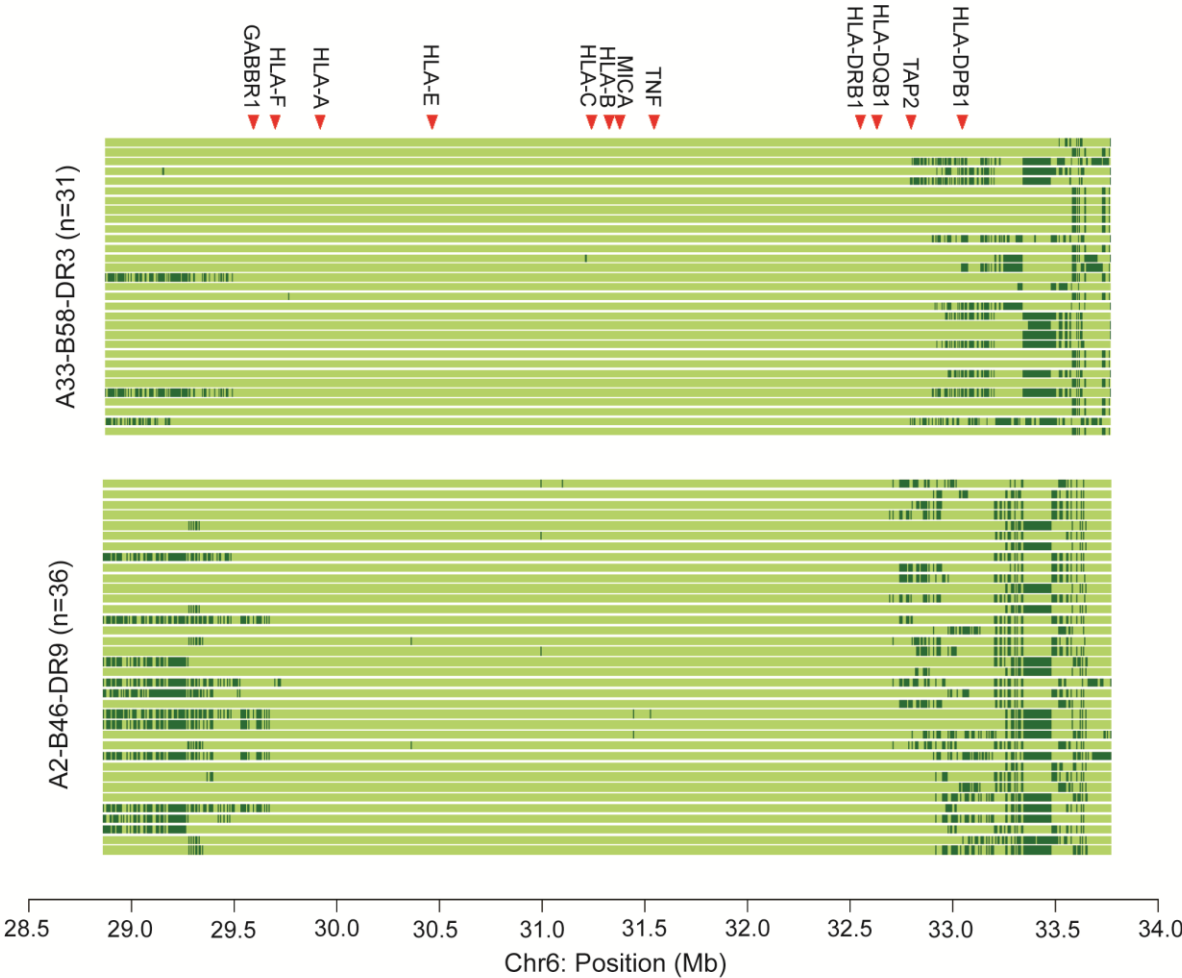

Figure S2

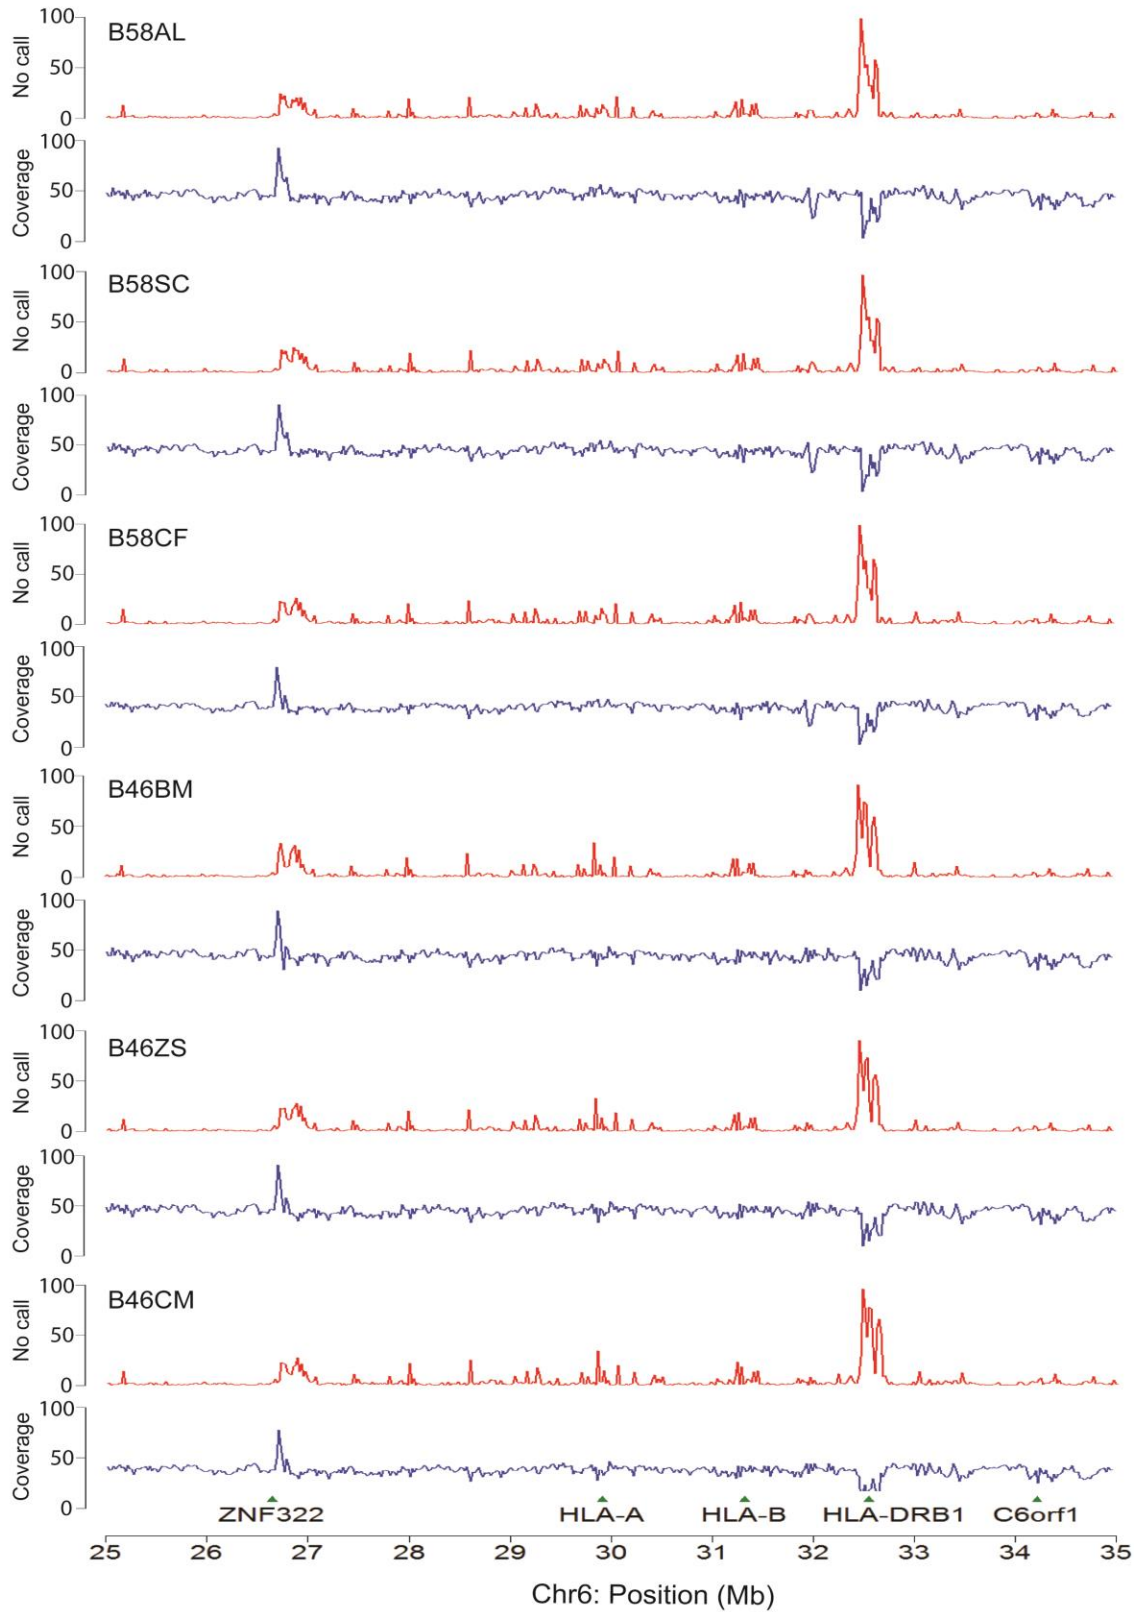

Figure S3

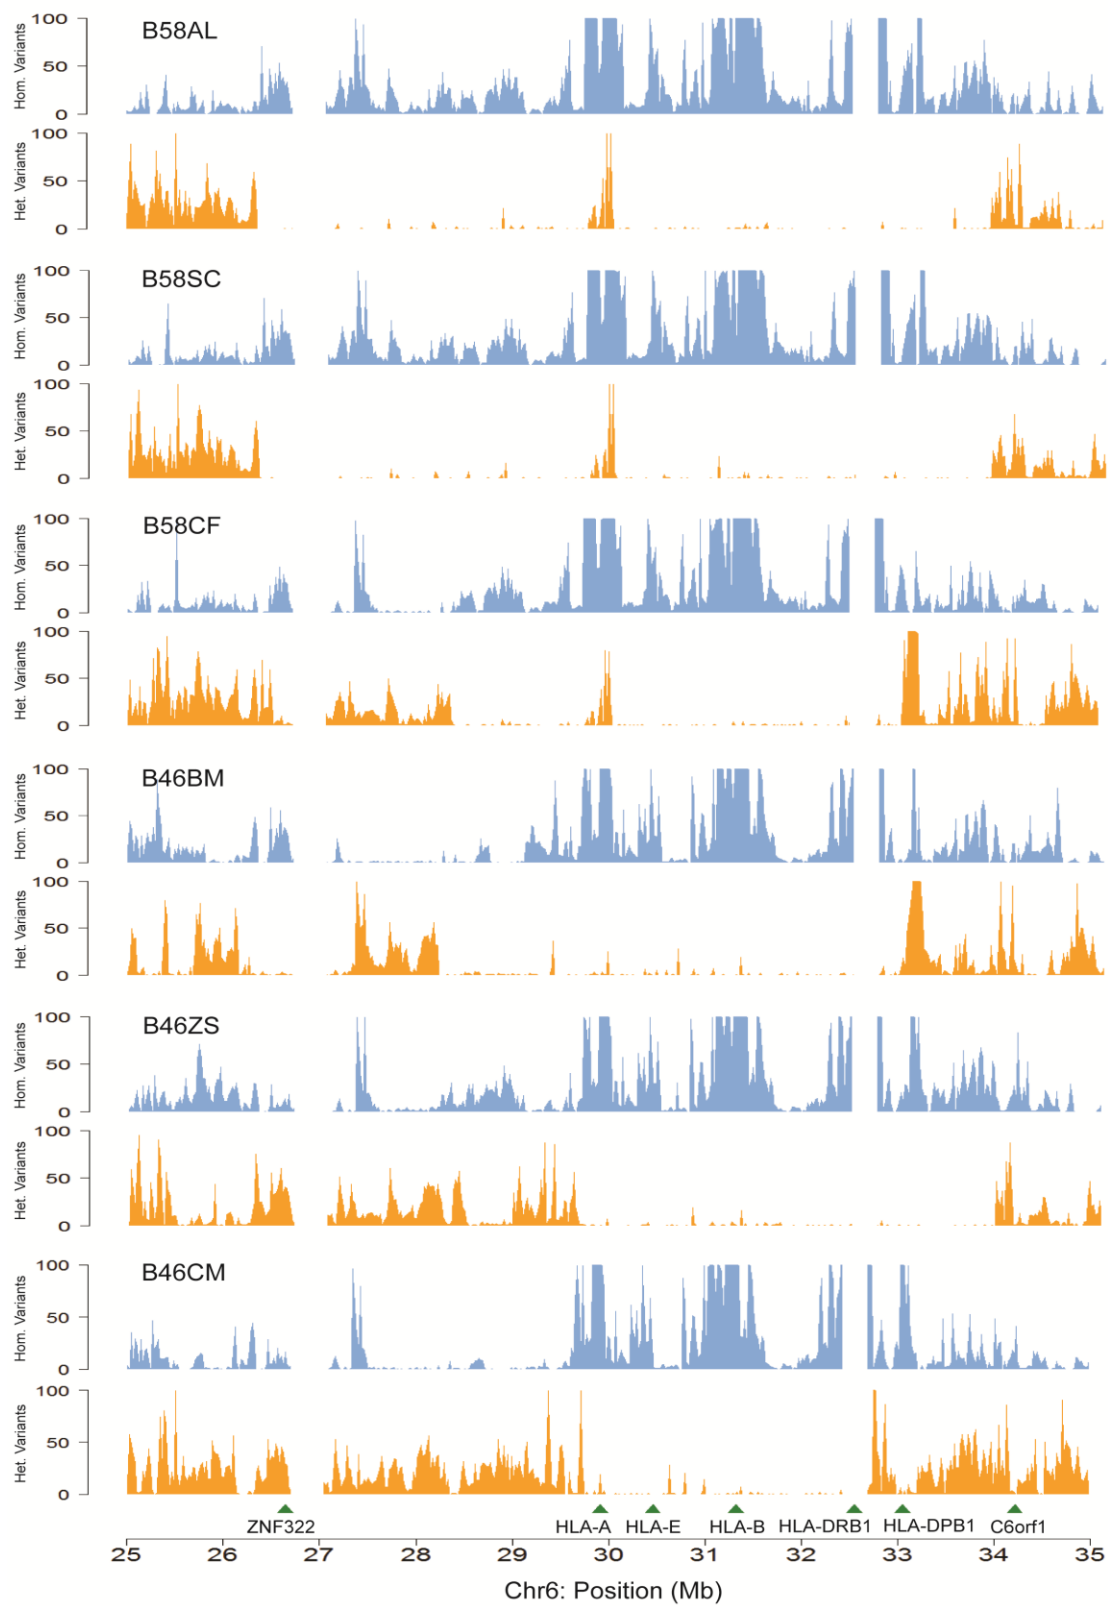

Figure S4

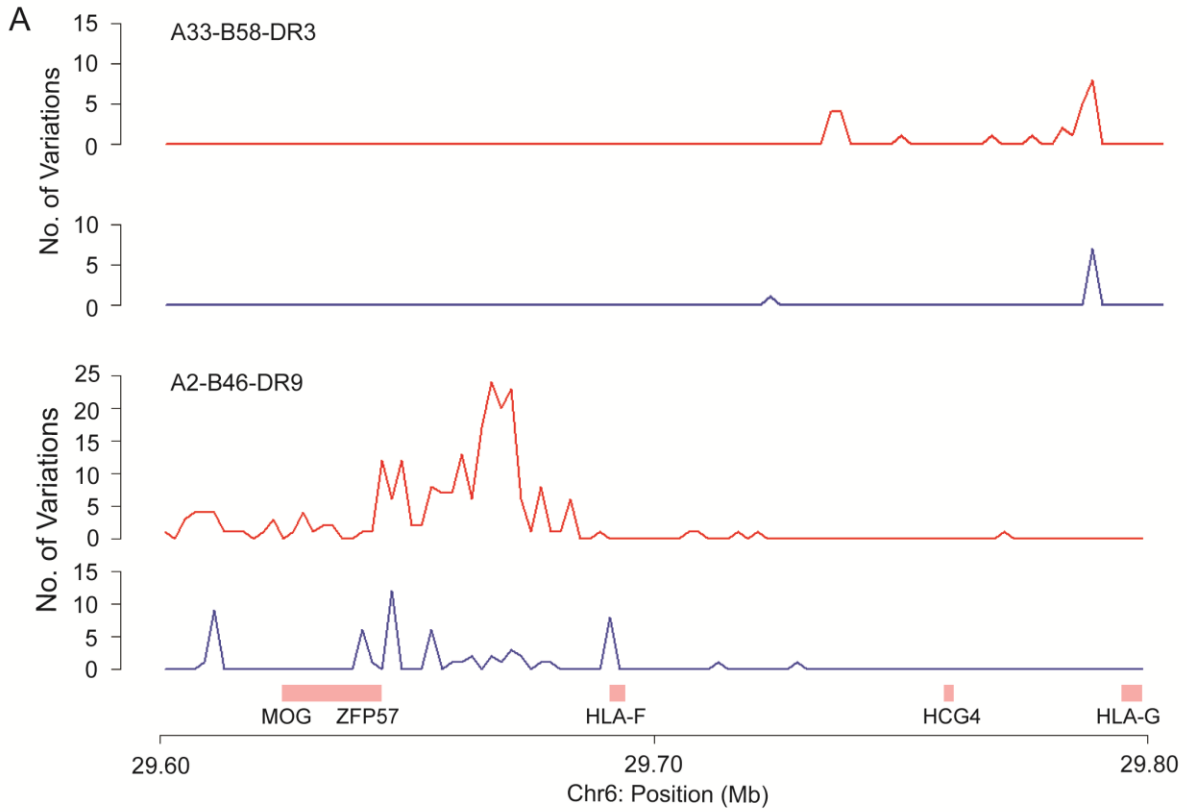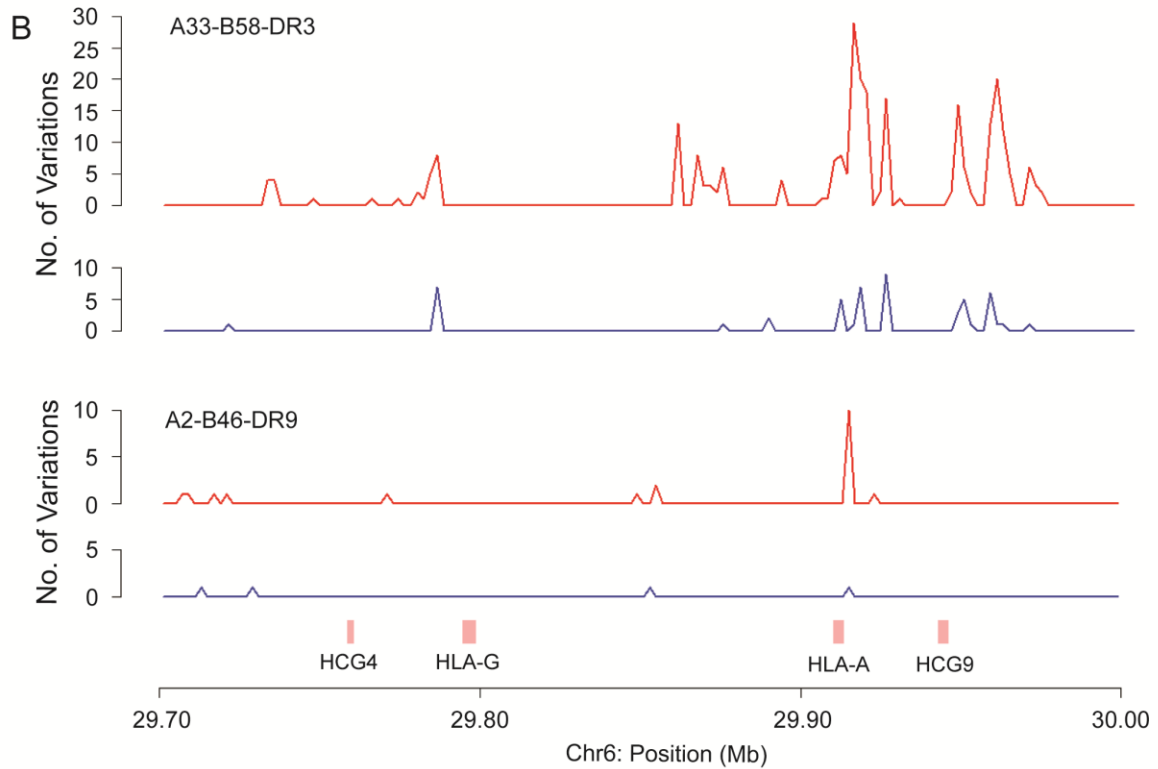

Figure S5

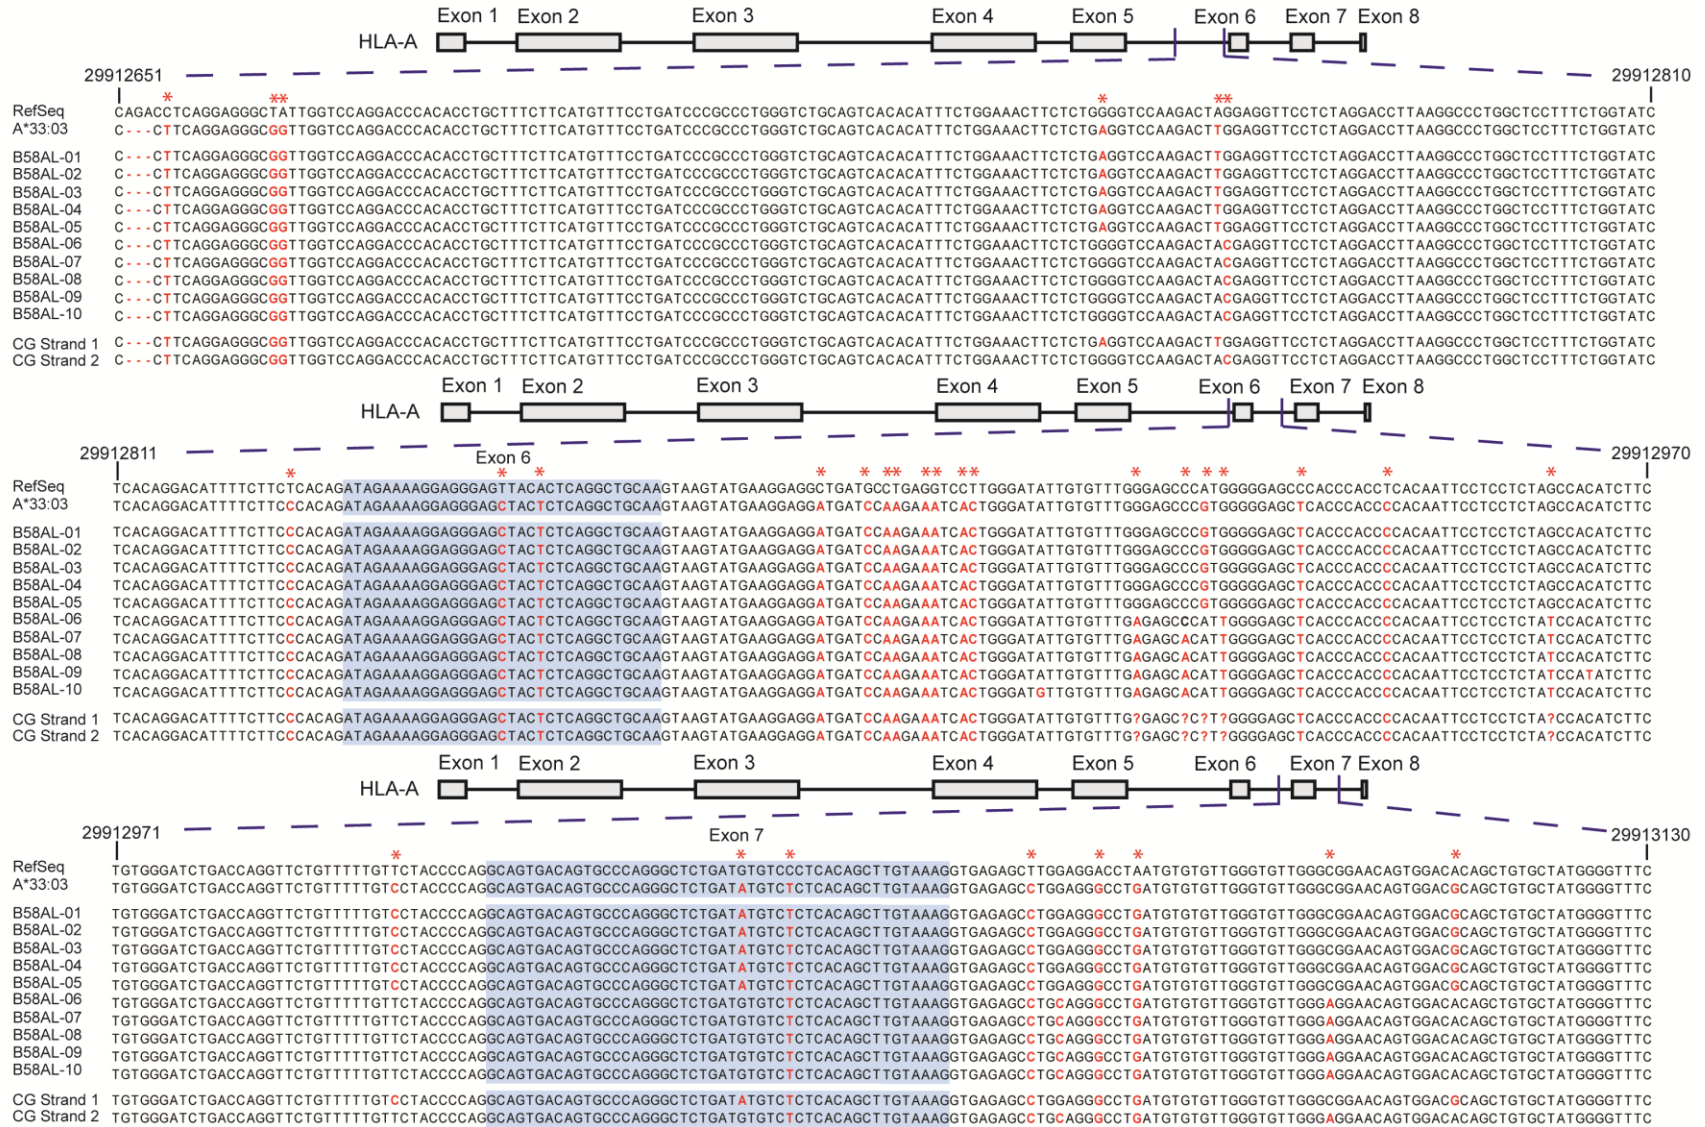



Figure S6

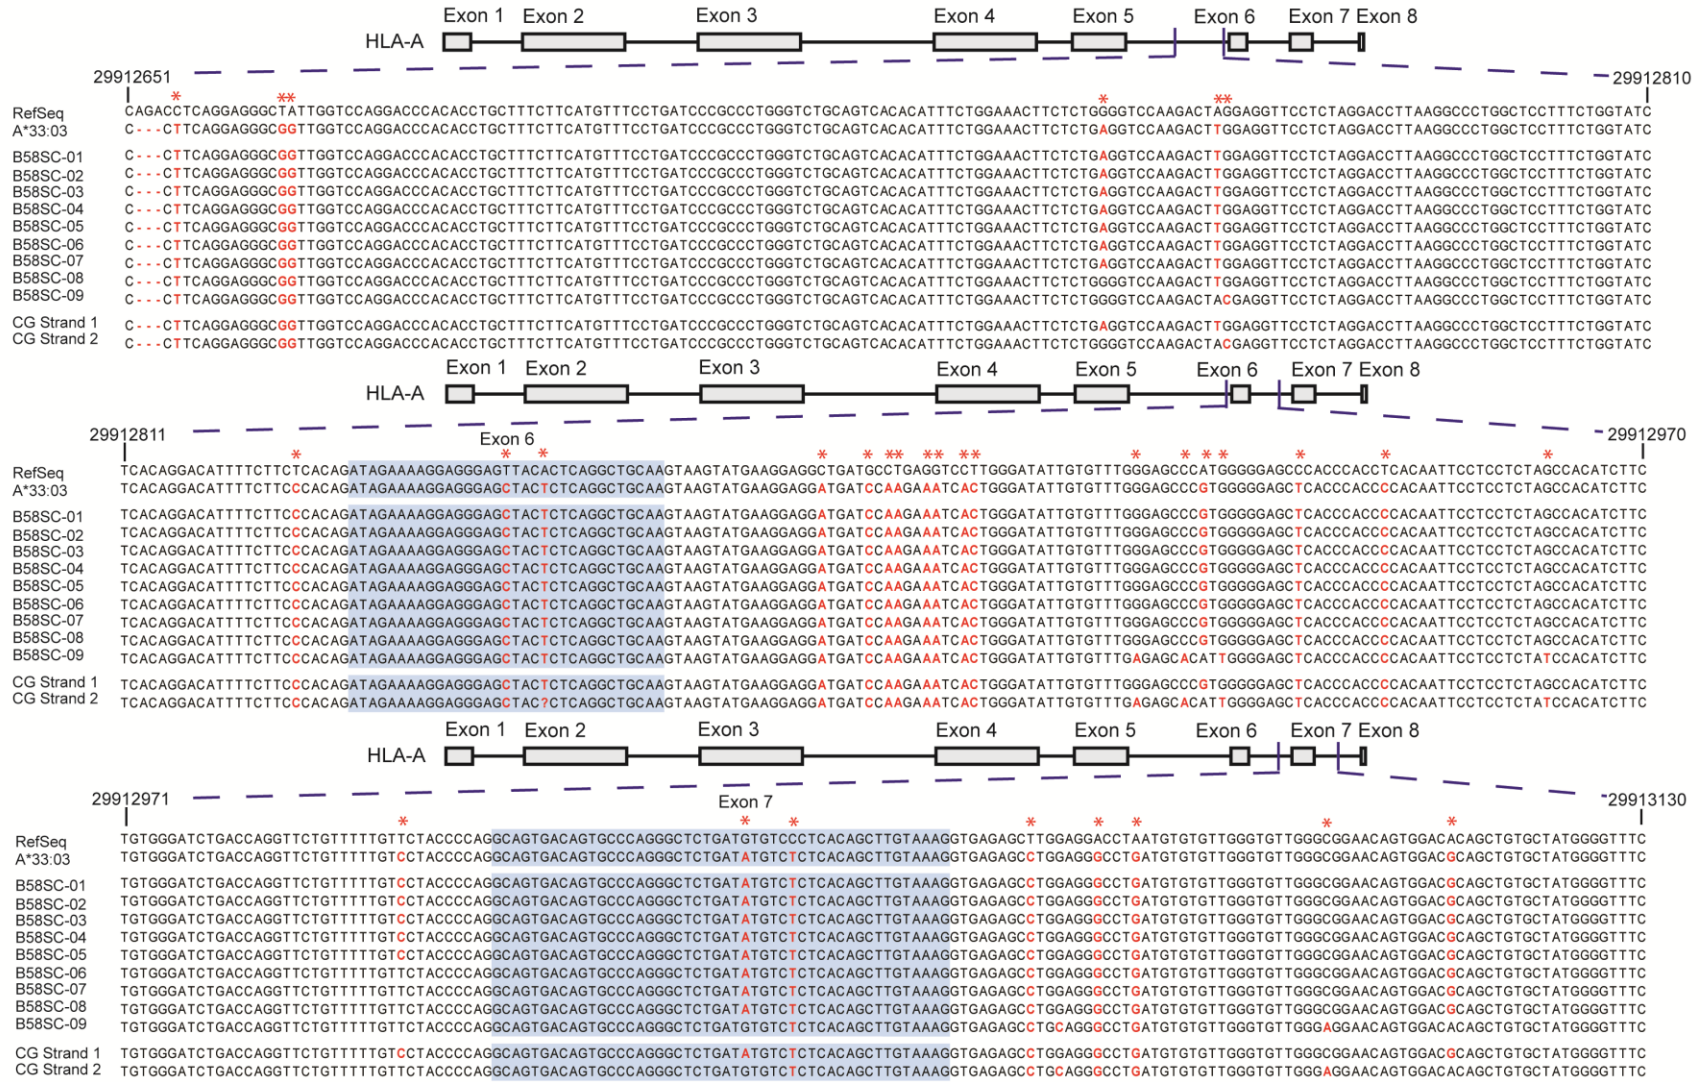



Figure S7

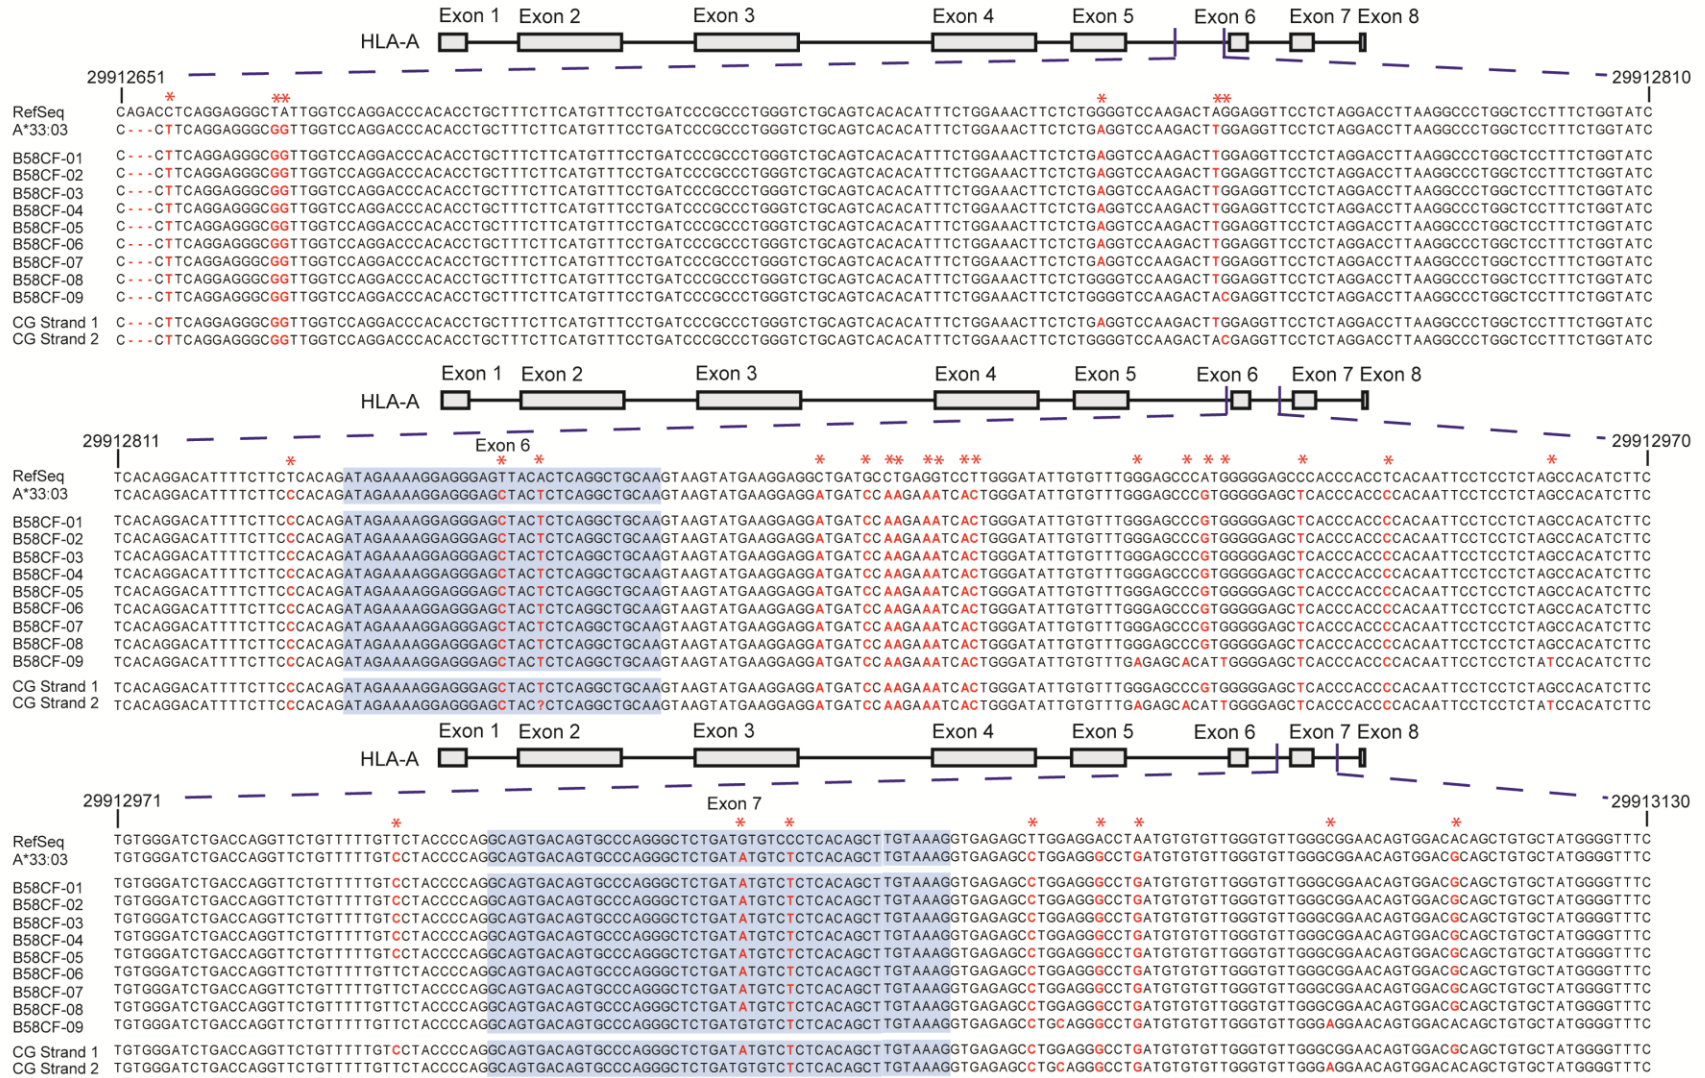

Figure S8

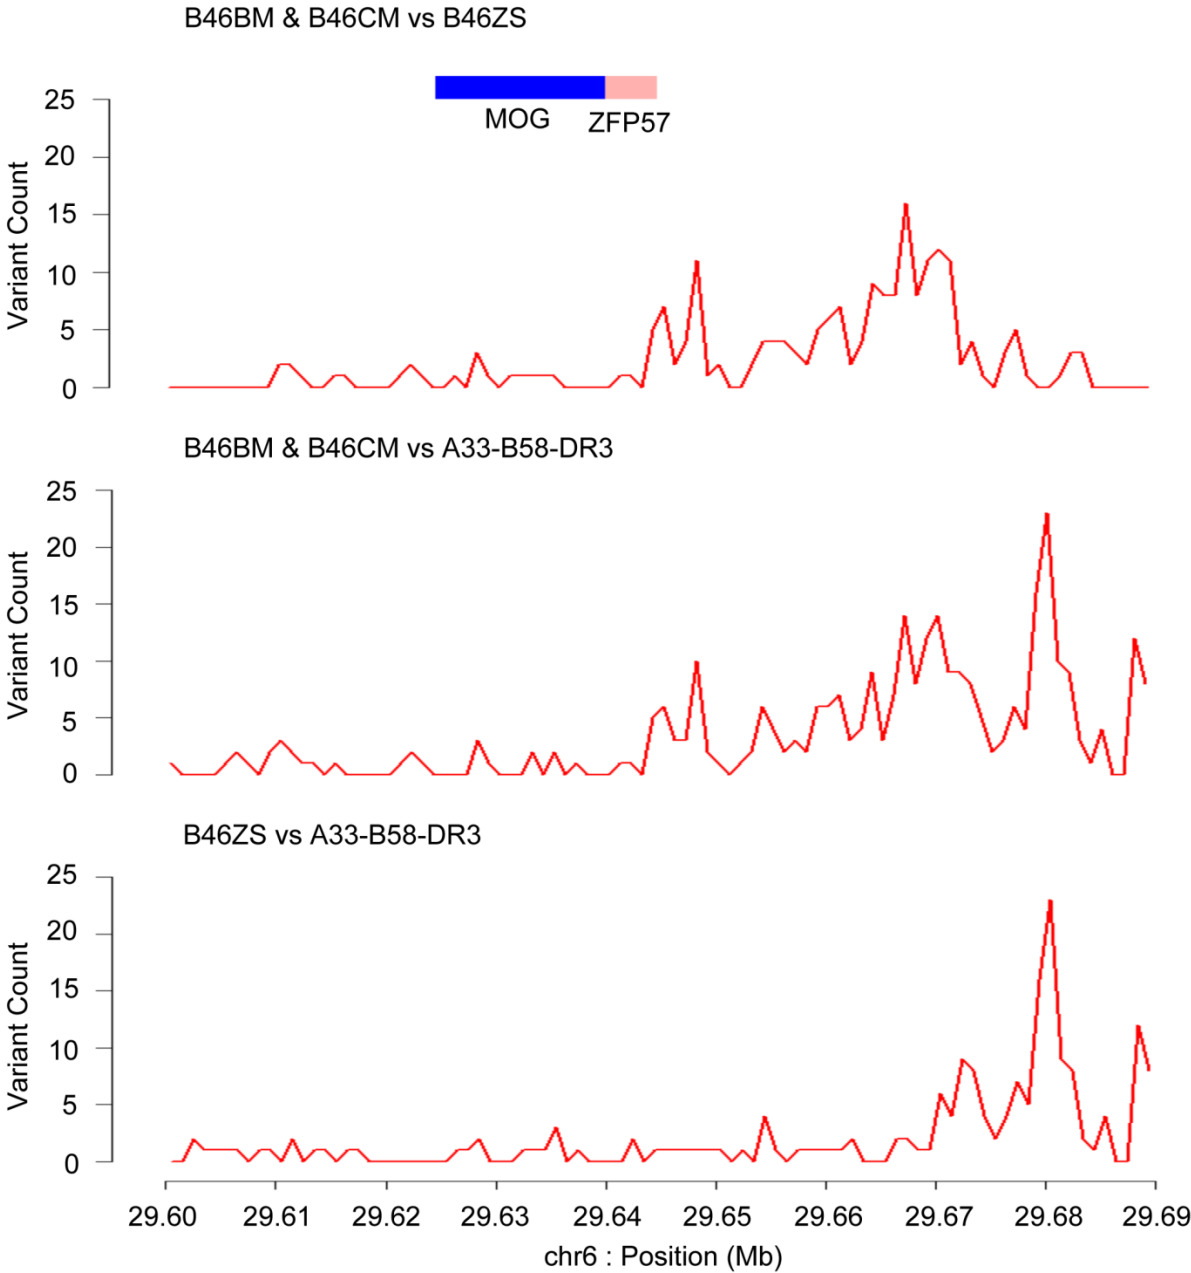

Figure S9

**A**

| rsID      | Position | H3k4me1 Signal |
|-----------|----------|----------------|
| rs3117318 | 29611781 | 4.52           |
| rs3129073 | 29615822 | 1.92           |
| rs3117295 | 29653377 | 4.08           |
| rs7738158 | 29667527 | 3.48           |
| rs3129056 | 29670250 | 3.6            |
| rs3129048 | 29670555 | 3.16           |
| rs3129047 | 29670572 | 3.16           |
| rs1610588 | 29676715 | 11.32          |
| rs1610589 | 29677386 | 17.36          |

**B**

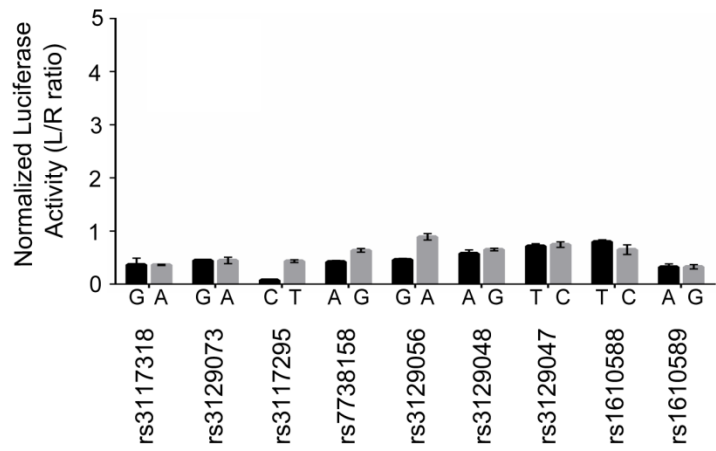

**Table S1.** Range of conserved extended region within the MHC for the six cell lines.

| Sample ID | SNP Genotyping Platform |          |             |             |                 | CG Sequencing Platform |          |             |                     |
|-----------|-------------------------|----------|-------------|-------------|-----------------|------------------------|----------|-------------|---------------------|
|           | Start                   | End      | Length (Mb) | No. of SNPs | No. of het SNPs | Start                  | End      | Length (Mb) | No. of het variants |
| B58AL     | 26922906                | 33853071 | 6.93        | 8660        | 26              | 26350000               | 33830000 | 7.48        | 595                 |
| B58SC     | 26922906                | 33820059 | 6.90        | 8637        | 26              | 26350000               | 33810000 | 7.46        | 578                 |
| B58CF     | 28310997                | 32973794 | 4.66        | 6997        | 35              | 28350000               | 32950000 | 4.60        | 455                 |
| B46BM     | 29350854                | 32903900 | 3.57        | 6238        | 25              | 29367500               | 32917500 | 3.55        | 221                 |
| B46ZS     | 29577617                | 33910884 | 4.33        | 6975        | 21              | 29630000               | 33890000 | 4.26        | 146                 |
| B46CM     | 29728209                | 32739888 | 3.01        | 5283        | 16              | 29550000               | 32650000 | 3.10        | 167                 |

**Table S2.** CG sequencing coverage and performance.

| Cell lines | Mean Coverage Per bp | % bp Coverage >5X | % bp Coverage >20X | % bp Coverage >40X | % of MHC region covered |
|------------|----------------------|-------------------|--------------------|--------------------|-------------------------|
| B58AL      | 44.67                | 98.14             | 91.09              | 61.40              | 95.31                   |
| B58SC      | 43.69                | 98.10             | 90.57              | 59.44              | 95.15                   |
| B58CF      | 39.06                | 97.96             | 88.14              | 49.10              | 94.66                   |
| B46BM      | 43.54                | 98.13             | 90.31              | 58.93              | 95.03                   |
| B46ZS      | 44.30                | 98.11             | 90.88              | 60.94              | 95.06                   |
| B46CM      | 37.13                | 97.86             | 86.64              | 44.20              | 94.18                   |

**Table S3.** SNP genotype calls differences between Illumina Human 1M-Duo BeadChip and CG sequencing. Hmz indicates homozygous genotype call and htz indicates heterozygous genotype call.

| Sample ID | Positions Compared | Differences hmz (1M-Duo) /hmz (CG) | Differences hmz (1M-Duo) /htz (CG) | Differences htz (1M-Duo) /hmz (CG) | Differences Total | % Match |
|-----------|--------------------|------------------------------------|------------------------------------|------------------------------------|-------------------|---------|
| B58AL     | 9916               | 15                                 | 1                                  | 23                                 | 39                | 99.6    |
| B58SC     | 9876               | 14                                 | 4                                  | 26                                 | 44                | 99.6    |
| B58CF     | 9880               | 12                                 | 8                                  | 27                                 | 47                | 99.5    |
| B46BM     | 9908               | 11                                 | 8                                  | 14                                 | 33                | 99.7    |
| B46ZS     | 9903               | 13                                 | 3                                  | 14                                 | 30                | 99.7    |
| B46CM     | 9904               | 12                                 | 10                                 | 13                                 | 35                | 99.6    |



**Table S4.** Re-sequencing experiments to assess mismatches between SNP genotyping and CG sequencing platform in samples carrying A33-B58-DR3.

| Forward Primer                | Reverse Primer                 | Position   | rsID       | Ref | B58AL     |     |     | B58SC     |     |     | B58CF     |     |     |
|-------------------------------|--------------------------------|------------|------------|-----|-----------|-----|-----|-----------|-----|-----|-----------|-----|-----|
|                               |                                |            |            |     | SNP Array | CG  | PCR | SNP Array | CG  | PCR | SNP Array | CG  | PCR |
| ACTGACAGAATGAAC<br>CTGCAGAC   | AATCACTCTCTGGTA<br>CAGGATCTGG  | 29,796,376 | rs12722477 | C   | C/C       | A/A | ?/? | C/C       | A/A | A/A | C/C       | A/A | A/A |
| TGAGAACTGGCGGG<br>GAGATA      | TCTCTTGCTGGCTCA<br>GCTTT       | 29,819,909 | rs2508053  | C   | C/T       | C/C | C/C | C/T       | C/C | C/C | C/T       | C/C | C/C |
| CTGACTCATATCAAG<br>GGCCAGAAA  | AGAGAGGAAAGTCA<br>GGACACAATAC  | 30,383,046 | GA005234   | C   | C/G       | C/C | C/C | C/G       | C/C | C/C | C/G       | C/C | C/C |
| ATAAAAACAGGCTGC<br>ATGTGGTAAA | AGTTGAGGTTTTTCT<br>GTTATGCCTG  | 30,418,354 | rs34111681 | G   | T/T       | G/G | G/G | T/T       | G/G | G/G | T/T       | G/G | G/G |
| CAGAACCAGGGAGA<br>TGAGACATAC  | TGTTCTGCTTCTCT<br>TTTCACTTTC   | 31,170,514 | rs9263870  | A   | A/G       | G/G | G/G | A/G       | G/G | G/G | A/G       | G/G | G/G |
| GAACATATGCTACAA<br>AAGGCCAGAG | GGTGTGGAGAAGGC<br>TGTGGG       | 31,321,327 | rs9266095  | A   | A/G       | A/A | A/A | A/G       | A/A | A/A | T/T       | G/G | ?/? |
| CTCTTGAAGGACTCT<br>GGTTAGAAG  | GCACCAGAGTTCAA<br>GAGAGAAAATTA | 31,639,979 | rs9267532  | C   | C/T       | T/T | T/T | C/T       | T/T | T/T | C/T       | T/T | T/T |
| CAATGCTTATAGGGT<br>ATCCCCAGTC | GCAGTGTACACACA<br>CAGATACTGAT  | 31,655,438 | rs10573    | G   | A/G       | A/A | A/A | A/G       | A/A | A/A | A/G       | A/A | A/A |
| TAGGGTCTCTAATCT<br>CCAAAACACC | CTAAAAGCCAGAGC<br>TCCCAGTCC    | 31,697,558 | rs707916   | G   | A/G       | A/A | ?/? | A/G       | A/A | ?/? | A/G       | A/A | A/A |
| CCTTTATGAGACCTG<br>CATTGAACC  | GGTACTCCAACACTG<br>ATCATAGGG   | 32,130,937 | rs10680    | T   | C/C       | T/T | T/T | C/C       | T/T | T/T | C/C       | T/T | ?/? |
| TCAGATTGAATTTTT<br>CCTCCCTTCC | GATTACAGCTTCCAC<br>AAGTTCCATT  | 33,036,549 | rs17509489 | T   | G/G       | T/T | ?/? | G/G       | T/T | T/T | G/G       | T/T | ?/? |

**Table S5.** Re-sequencing experiments to assess mismatches between SNP genotyping and CG sequencing platform in samples carrying A2-B46-DR9.

| Forward Primer                 | Reverse Primer                | Position   | rsID       | Ref | B46BM     |         |         | B46ZS     |         |     | B46CM     |         |         |
|--------------------------------|-------------------------------|------------|------------|-----|-----------|---------|---------|-----------|---------|-----|-----------|---------|---------|
|                                |                               |            |            |     | SNP Array | CG      | PCR     | SNP Array | CG      | PCR | SNP Array | CG      | PCR     |
| AGTACATGTAGACAG<br>CTCACAGT    | GCACAGGGAATGTG<br>TTCTCG      | 29,801,958 | rs2743944  | T   | T/C       | T/T     | T/C     | T/C       | T/T     | T/C | T/C       | T/T     | T/C     |
| GGGGTTTCTTTGCAT<br>TGGATGTATT  | TTGTCTCTTGATACC<br>ACAAGGAGAT | 29,913,509 | rs1062405  | T   | C/C       | T/T     | T/T     | C/C       | T/T     | T/T | C/C       | T/T     | T/T     |
| ATAGAATTAGAAAAGA<br>GGCTGGGGTC | GTGCTAATGAAAGTT<br>GGGCCTTAG  | 29,942,191 | rs2232236  | T   | G/G       | del/del | del/del | G/G       | del/del | ??  | G/G       | del/del | del/del |
| CTTTCAGTTCTCTTC<br>TGTGTCTCCA  | AGTATATTAGGTTAG<br>CGGGTGGTAG | 30,704,985 | rs28380598 | T   | C/C       | T/T     | T/T     | C/C       | T/T     | T/T | C/C       | T/T     | T/T     |
| CCGTGGGGATGGCT<br>AGAAAA       | CCCTGAGGGAATCT<br>GGGGTA      | 31,079,236 | rs1265055  | G   | A/G       | A/A     | A/A     | A/G       | A/A     | A/A | A/G       | A/A     | A/A     |
| GATTCCAGACTTGGA<br>GTTTCAACAG  | GAGTAAAGGACTGA<br>GAGGATGGGA  | 31,082,304 | rs3130554  | T   | G/T       | T/T     | T/T     | G/T       | T/T     | T/T | G/T       | T/T     | T/T     |
| CCTTTATGAGACCTG<br>CATTGAACC   | GGTACTCCAACACTG<br>ATCATAGGG  | 32,130,937 | rs10680    | T   | C/C       | T/T     | T/T     | C/C       | T/T     | T/T | C/C       | T/T     | ??      |
| TCAGATTGAATTTTT<br>CCTCCCTTCC  | GATTACAGCTTCCAC<br>AAGTTCCATT | 33,036,549 | rs17509489 | T   | G/G       | C/T     | C/T     | G/G       | T/T     | T/T | G/G       | T/T     | T/T     |

**Table S6.** Intra-CEH SNVs within coding sequence region.

---

**A2-B46-DR9**

---

| Position Start | Position End | Alternate Allele | Reference Allele | Variant Type | Effect   | Gene   | Exon |
|----------------|--------------|------------------|------------------|--------------|----------|--------|------|
| 29,634,002     | 29,634,003   | C                | G                | SNV          | missense | MOG    | 3    |
| 32,190,483     | 32,190,484   | A                | G                | SNV          | synon    | NOTCH4 | 3    |

---

**A33-B58-DR3**

---

| Position Start | Position End | Alternate Allele | Reference Allele | Variant Type | Effect   | Gene  | Exon |
|----------------|--------------|------------------|------------------|--------------|----------|-------|------|
| 29,913,036     | 29,913,037   | A                | G                | SNV          | missense | HLA-A | 7    |

---

**Table S7.** Variants within DNA template chr6:29,912,732 – 29,913,130.

| Position Start | Position End | Region | VarType | Zygoty | Reference | B58AL       |            | B58SC       |            | B58CF       |            |
|----------------|--------------|--------|---------|--------|-----------|-------------|------------|-------------|------------|-------------|------------|
|                |              |        |         |        |           | CG Sequence | TA Cloning | CG Sequence | TA Cloning | CG Sequence | TA Cloning |
| 29,912,652     | 29,912,657   | Intron | SUB     | Hom    | AGACC     | CT/CT       | CT/CT      | CT/CT       | CT/CT      | CT/CT       | CT/CT      |
| 29,912,667     | 29,912,669   | Intron | SUB     | Hom    | TA        | GG/GG       | GG/GG      | GG/GG       | GG/GG      | GG/GG       | GG/GG      |
| 29,912,753     | 29,912,754   | Intron | SNV     | Het    | G         | G/A         | G/A        | G/A         | G/A        | G/A         | G/A        |
| 29,912,765     | 29,912,766   | Intron | SNV     | Het    | A         | A/T         | A/T        | A/T         | A/T        | A/T         | A/T        |
| 29,912,766     | 29,912,767   | Intron | SNV     | Het    | G         | G/C         | G/C        | G/C         | G/C        | G/C         | G/C        |
| 29,912,829     | 29,912,830   | Intron | SNV     | Hom    | T         | C/C         | C/C        | C/C         | C/C        | ??          | C/C        |
| 29,912,851     | 29,912,852   | Exon 6 | SNV     | Hom    | T         | C/C         | C/C        | C/C         | C/C        | C/C         | C/C        |
| 29,912,855     | 29,912,856   | Exon 6 | SNV     | Hom    | A         | T/T         | T/T        | T/?         | T/T        | T/T         | T/T        |
| 29,912,884     | 29,912,885   | Intron | SNV     | Hom    | C         | A/A         | A/A        | A/A         | A/A        | A/A         | A/A        |
| 29,912,889     | 29,912,893   | Intron | SUB     | Hom    | GCCT      | CCAA/CCAA   | CCAA/CCAA  | CCAA/CCAA   | CCAA/CCAA  | CCAA/CCAA   | CCAA/CCAA  |
| 29,912,895     | 29,912,897   | Intron | SUB     | Hom    | GG        | AA/AA       | AA/AA      | AA/AA       | AA/AA      | AA/AA       | AA/AA      |
| 29,912,899     | 29,912,901   | Intron | SUB     | Hom    | CT        | AC/AC       | AC/AC      | AC/AC       | AC/AC      | AC/AC       | AC/AC      |
| 29,912,917     | 29,912,918   | Intron | SNV     | Het    | G         | ??          | G/A        | G/A         | G/A        | ??          | G/A        |
| 29,912,922     | 29,912,923   | Intron | SNV     | Het    | C         | ??          | C/A        | C/A         | C/A        | ??          | C/A        |
| 29,912,924     | 29,912,925   | Intron | SNV     | Het    | A         | ??          | A/G        | A/G         | A/G        | ??          | A/G        |
| 29,912,926     | 29,912,927   | Intron | SNV     | Het    | G         | ??          | G/T        | G/T         | G/T        | ??          | G/T        |
| 29,912,934     | 29,912,935   | Intron | SNV     | Hom    | C         | T/T         | T/T        | T/T         | T/T        | T/T         | T/T        |
| 29,912,943     | 29,912,944   | Intron | SNV     | Hom    | T         | C/C         | C/C        | C/C         | C/C        | C/C         | C/C        |
| 29,912,960     | 29,912,961   | Intron | SNV     | Het    | G         | ??          | G/T        | G/T         | G/T        | G/?         | G/T        |
| 29,913,000     | 29,913,001   | Intron | SNV     | Het    | T         | T/C         | T/C        | T/C         | T/C        | T/C         | T/C        |
| 29,913,036     | 29,913,037   | Exon 7 | SNV     | Het    | G         | G/A         | G/A        | G/A         | G/A        | G/A         | G/A        |
| 29,913,041     | 29,913,042   | Exon 7 | SNV     | Hom    | C         | T/T         | T/T        | T/T         | T/T        | T/T         | T/T        |
| 29,913,066     | 29,913,067   | Intron | SNV     | Hom    | T         | C/C         | C/C        | C/C         | C/C        | C/C         | C/C        |
| 29,913,069     | 29,913,070   | Intron | SNV     | Het    | G         | G/C         | G/C        | G/C         | G/C        | G/C         | G/C        |
| 29,913,073     | 29,913,074   | Intron | SNV     | Hom    | A         | G/G         | G/G        | G/G         | G/G        | G/G         | G/G        |
| 29,913,077     | 29,913,078   | Intron | SNV     | Hom    | A         | G/G         | G/G        | G/G         | G/G        | G/G         | G/G        |
| 29,913,097     | 29,913,098   | Intron | SNV     | Het    | C         | C/A         | C/A        | C/A         | C/A        | C/A         | C/A        |
| 29,913,110     | 29,913,111   | Intron | SNV     | Het    | A         | A/G         | A/G        | A/G         | A/G        | A/G         | A/G        |



**Table S9.** Novel SNVs in the A33-B58-DR3 haplotype.

| Position Start | Position End | Alternate Allele | Reference Allele | Gene                 |
|----------------|--------------|------------------|------------------|----------------------|
| 28,840,256     | 28,840,257   | C                | A                | LOC401242 Downstream |
| 29,035,463     | 29,035,464   | G                | A                | LOC100129636 intron  |
| 29,035,477     | 29,035,478   | T                | C                | LOC100129636 intron  |
| 29,734,245     | 29,734,246   | T                | G                | IFITM4P Downstream   |
| 29,747,779     | 29,747,780   | A                | C                | IFITM4P Downstream   |
| 29,765,233     | 29,765,234   | C                | A                | LOC554223 3' UTR     |
| 29,779,058     | 29,779,059   | G                | A                | HLA-G Downstream     |
| 29,779,067     | 29,779,068   | G                | A                | HLA-G Downstream     |
| 29,783,925     | 29,783,926   | C                | T                | HLA-H Upstream       |
| 29,783,930     | 29,783,931   | T                | C                | HLA-H Upstream       |
| 29,783,931     | 29,783,932   | A                | C                | HLA-H Upstream       |
| 29,784,433     | 29,784,434   | C                | T                | HLA-H Upstream       |
| 29,859,618     | 29,859,619   | A                | C                | HLA-H Downstream     |
| 29,859,620     | 29,859,621   | C                | T                | HLA-H Downstream     |
| 29,859,927     | 29,859,928   | G                | A                | HLA-H Downstream     |
| 29,859,928     | 29,859,929   | T                | C                | HLA-H Downstream     |
| 29,867,025     | 29,867,026   | T                | A                | HLA-H Downstream     |
| 29,867,026     | 29,867,027   | G                | C                | HLA-H Downstream     |
| 29,869,426     | 29,869,427   | G                | A                | HLA-H Downstream     |
| 29,869,429     | 29,869,430   | A                | C                | HLA-H Downstream     |
| 29,869,434     | 29,869,435   | C                | T                | HLA-H Downstream     |
| 29,872,187     | 29,872,188   | G                | A                | HCG4B Upstream       |
| 29,872,188     | 29,872,189   | A                | G                | HCG4B Upstream       |
| 29,872,841     | 29,872,842   | A                | T                | HCG4B Upstream       |
| 29,872,843     | 29,872,844   | A                | T                | HCG4B Upstream       |
| 29,890,605     | 29,890,606   | A                | C                | HCG4B Upstream       |
| 29,903,515     | 29,903,516   | G                | C                | HLA-A Upstream       |
| 29,904,860     | 29,904,861   | T                | C                | HLA-A Upstream       |
| 29,906,004     | 29,906,005   | A                | C                | HLA-A Upstream       |
| 29,906,078     | 29,906,079   | C                | A                | HLA-A Upstream       |
| 29,906,079     | 29,906,080   | T                | C                | HLA-A Upstream       |
| 29,906,654     | 29,906,655   | T                | C                | HLA-A Upstream       |
| 29,906,674     | 29,906,675   | C                | T                | HLA-A Upstream       |
| 29,909,682     | 29,909,683   | C                | T                | HLA-A Upstream       |
| 29,909,685     | 29,909,686   | T                | C                | HLA-A Upstream       |
| 29,909,688     | 29,909,689   | A                | C                | HLA-A Upstream       |
| 29,909,834     | 29,909,835   | G                | A                | HLA-A Upstream       |
| 29,913,273     | 29,913,274   | C                | T                | HLA-A 3' UTR         |
| 29,913,837     | 29,913,838   | C                | G                | HLA-A Downstream     |

| Position Start | Position End | Alternate Allele | Reference Allele | Gene             |
|----------------|--------------|------------------|------------------|------------------|
| 29,913,944     | 29,913,945   | G                | A                | HLA-A Downstream |
| 29,914,625     | 29,914,626   | C                | T                | HLA-A Downstream |
| 29,914,943     | 29,914,944   | C                | T                | HLA-A Downstream |
| 29,914,944     | 29,914,945   | T                | G                | HLA-A Downstream |
| 29,915,123     | 29,915,124   | A                | C                | HLA-A Downstream |
| 29,915,147     | 29,915,148   | T                | C                | HLA-A Downstream |
| 29,915,148     | 29,915,149   | G                | A                | HLA-A Downstream |
| 29,915,150     | 29,915,151   | G                | T                | HLA-A Downstream |
| 29,915,966     | 29,915,967   | T                | C                | HLA-A Downstream |
| 29,926,156     | 29,926,157   | A                | G                | HCG9 Upstream    |
| 29,944,177     | 29,944,178   | A                | C                | HCG9 intron      |
| 29,944,307     | 29,944,308   | G                | T                | HCG9 intron      |
| 29,944,308     | 29,944,309   | G                | C                | HCG9 intron      |
| 29,944,324     | 29,944,325   | A                | T                | HCG9 intron      |
| 29,944,326     | 29,944,327   | G                | A                | HCG9 intron      |
| 29,944,327     | 29,944,328   | C                | G                | HCG9 intron      |
| 29,955,808     | 29,955,809   | C                | T                | HCG9 Downstream  |
| 29,956,118     | 29,956,119   | G                | A                | HCG9 Downstream  |
| 29,956,126     | 29,956,127   | C                | G                | HCG9 Downstream  |
| 29,956,134     | 29,956,135   | C                | A                | HCG9 Downstream  |
| 29,956,137     | 29,956,138   | C                | T                | HCG9 Downstream  |
| 29,956,138     | 29,956,139   | A                | G                | HCG9 Downstream  |
| 29,956,484     | 29,956,485   | C                | T                | HCG9 Downstream  |
| 29,956,486     | 29,956,487   | G                | T                | HCG9 Downstream  |
| 29,960,539     | 29,960,540   | C                | T                | HLA-J Upstream   |
| 29,960,552     | 29,960,553   | A                | T                | HLA-J Upstream   |
| 29,960,564     | 29,960,565   | T                | C                | HLA-J Upstream   |
| 29,967,872     | 29,967,873   | T                | C                | HLA-J Upstream   |
| 29,968,000     | 29,968,001   | A                | C                | HLA-J Upstream   |
| 29,968,002     | 29,968,003   | C                | G                | HLA-J Upstream   |
| 29,968,011     | 29,968,012   | G                | A                | HLA-J Upstream   |
| 29,968,015     | 29,968,016   | C                | G                | HLA-J Upstream   |
| 30,467,075     | 30,467,076   | A                | G                | HLA-E Downstream |
| 30,467,077     | 30,467,078   | C                | G                | HLA-E Downstream |
| 30,467,086     | 30,467,087   | G                | A                | HLA-E Downstream |
| 31,348,653     | 31,348,654   | G                | A                | HLA-E Downstream |
| 31,348,655     | 31,348,656   | T                | G                | HLA-E Downstream |
| 31,363,403     | 31,363,404   | T                | A                | MICA Upstream    |



**Table S10.** Novel SNVs in the A2-B46-DR9 haplotype.

| Position<br>Start | Position<br>End | Alternate<br>Allele | Reference<br>Allele | Gene             |
|-------------------|-----------------|---------------------|---------------------|------------------|
| 29,632,317        | 29,632,318      | T                   | C                   | MOG intron       |
| 29,634,002        | 29,634,003      | C                   | G                   | MOG exon 3       |
| 29,635,507        | 29,635,508      | A                   | G                   | MOG intron       |
| 29,642,911        | 29,642,912      | C                   | G                   | ZFP57 intron     |
| 29,645,725        | 29,645,726      | T                   | C                   | ZFP57 Downstream |
| 29,650,130        | 29,650,131      | G                   | A                   | ZFP57 Downstream |
| 29,654,569        | 29,654,570      | A                   | T                   | ZFP57 Downstream |
| 29,665,318        | 29,665,319      | T                   | C                   | ZFP57 Downstream |
| 29,665,360        | 29,665,361      | G                   | A                   | ZFP57 Downstream |
| 29,666,307        | 29,666,308      | G                   | A                   | ZFP57 Downstream |
| 29,667,478        | 29,667,479      | T                   | C                   | ZFP57 Downstream |
| 29,670,365        | 29,670,366      | T                   | C                   | HLA-F Upstream   |
| 29,670,442        | 29,670,443      | A                   | G                   | HLA-F Upstream   |
| 29,671,092        | 29,671,093      | A                   | G                   | HLA-F Upstream   |
| 29,671,299        | 29,671,300      | T                   | G                   | HLA-F Upstream   |
| 29,671,769        | 29,671,770      | A                   | C                   | HLA-F Upstream   |
| 29,672,940        | 29,672,941      | C                   | T                   | HLA-F Upstream   |
| 29,673,817        | 29,673,818      | C                   | T                   | HLA-F Upstream   |
| 29,673,928        | 29,673,929      | A                   | G                   | HLA-F Upstream   |
| 29,676,316        | 29,676,317      | A                   | G                   | HLA-F Upstream   |
| 29,677,099        | 29,677,100      | A                   | G                   | HLA-F Upstream   |
| 29,677,640        | 29,677,641      | C                   | T                   | HLA-F Upstream   |
| 29,677,786        | 29,677,787      | T                   | C                   | HLA-F Upstream   |
| 29,682,866        | 29,682,867      | C                   | T                   | HLA-F Upstream   |
| 29,683,808        | 29,683,809      | T                   | C                   | HLA-F Upstream   |

| Position<br>Start | Position<br>End | Alternate<br>Allele | Reference<br>Allele | Gene                 |
|-------------------|-----------------|---------------------|---------------------|----------------------|
| 29,717,380        | 29,717,381      | G                   | C                   | HLA-F-AS1 Downstream |
| 29,770,566        | 29,770,567      | T                   | C                   | LOC554223 Downstream |
| 29,855,724        | 29,855,725      | T                   | C                   | HLA-H intron         |
| 29,855,725        | 29,855,726      | C                   | T                   | HLA-H intron         |
| 29,914,696        | 29,914,697      | A                   | C                   | HLA-A Downstream     |
| 29,914,943        | 29,914,944      | C                   | T                   | HLA-A Downstream     |
| 29,914,944        | 29,914,945      | T                   | G                   | HLA-A Downstream     |
| 29,914,968        | 29,914,969      | A                   | C                   | HLA-A Downstream     |
| 29,915,112        | 29,915,113      | T                   | A                   | HLA-A Downstream     |
| 29,915,118        | 29,915,119      | G                   | A                   | HLA-A Downstream     |
| 29,923,565        | 29,923,566      | C                   | A                   | HLA-A Downstream     |
| 30,100,792        | 30,100,793      | T                   | C                   | TRIM40 Upstream      |
| 30,570,769        | 30,570,770      | T                   | C                   | PPP1R10 intron       |
| 30,768,863        | 30,768,864      | C                   | T                   | IER3 Downstream      |
| 30,789,947        | 30,789,948      | T                   | C                   | DDR1 Upstream        |
| 30,981,052        | 30,981,053      | G                   | A                   | MUC22 intron         |
| 30,981,055        | 30,981,056      | A                   | G                   | MUC22 intron         |
| 30,981,057        | 30,981,058      | T                   | C                   | MUC22 intron         |
| 30,981,064        | 30,981,065      | G                   | A                   | MUC22 intron         |
| 31,197,816        | 31,197,817      | C                   | T                   | HLA-C Upstream       |
| 31,197,818        | 31,197,819      | T                   | C                   | HLA-C Upstream       |
| 31,197,820        | 31,197,821      | C                   | T                   | HLA-C Upstream       |
| 31,496,777        | 31,496,778      | G                   | C                   | MCCD1 5' UTR         |
| 31,850,914        | 31,850,915      | A                   | G                   | EHMT2 intron         |
| 32,050,846        | 32,050,847      | T                   | C                   | TNXB intron          |

**Table S11.** Regions of low and high variation between the sequenced MHC haplotypes.

| Regions with variations below genome average |          |             |                   |                                                                                         |
|----------------------------------------------|----------|-------------|-------------------|-----------------------------------------------------------------------------------------|
| Start                                        | End      | Length (kb) | Mean variant /5kb | Genes                                                                                   |
| 28350000                                     | 28415000 | 65          | 0.61              | ZSCAN12, ZSCAN23                                                                        |
| 28430000                                     | 28495000 | 65          | 1.96              | GPX6                                                                                    |
| 28560000                                     | 28670000 | 110         | 0.78              | Downstream SCAND3, Upstream LOC401242                                                   |
| 29545000                                     | 29630000 | 85          | 1.47              | SNORD32B, OR2H2, GABBR1                                                                 |
| 30545000                                     | 30680000 | 135         | 1.49              | PPP1R10, MRPS18B, ATAT1, C6orf136, DHX16, PPP1R18, NRM                                  |
| 31690000                                     | 31805000 | 115         | 1.66              | DDAH2, CLIC1, MSH5, SAPCD1, VWA7, VARS, LSM2, HSPA1L, HSPA1A, HSPA1B                    |
| 31845000                                     | 31895000 | 50          | 1.90              | EHMT2, C2, ZBTB12                                                                       |
| 31905000                                     | 31965000 | 60          | 1.39              | C2, CFB, NELFE, SKIV2L, DOM3Z, STK19, C4A, C4B                                          |
| 31980000                                     | 32160000 | 180         | 1.84              | CYP21A2, TNXB, ATF6B, FKBPL, PRRT1, LOC100507547, PPT2, EGFL8, AGPAT1, RNF5, AGER, PBX2 |
| 32855000                                     | 32895000 | 40          | 1.35              | LOC100294145                                                                            |
| Regions with extreme variation               |          |             |                   |                                                                                         |
| Start                                        | End      | Length (kb) | Mean variant /5kb | Genes                                                                                   |
| 29665000                                     | 29715000 | 50          | 16.16             | HLA-F                                                                                   |
| 29730000                                     | 29805000 | 75          | 26.54             | HCG4, LOC554223, HLA-G                                                                  |
| 29820000                                     | 29975000 | 155         | 36.93             | HLA-H, HCG4B, HLA-A, HCG9                                                               |
| 31005000                                     | 31105000 | 100         | 19.59             | HCG22, C6orf15, PSORS1C1, CDSN                                                          |
| 31155000                                     | 31360000 | 205         | 45.62             | HCG27, HLA-C, HLA-B                                                                     |
| 31375000                                     | 31415000 | 40          | 22.38             | MICA                                                                                    |
| 32190000                                     | 32220000 | 30          | 18.97             | Downstream NOTCH4                                                                       |
| 32665000                                     | 32775000 | 110         | 37.40             | HLA-DQA2, HLA-DQB2                                                                      |

**Table S12.** Prime pairs to amplify genomic fragment carrying specific alleles of each intra-CEH variant s for cloning into expression vector.

| rsID      | Forward Primer                                                | Reverse Primer                                                        |
|-----------|---------------------------------------------------------------|-----------------------------------------------------------------------|
| rs3117318 | CTTTTGTGTTTTAGTAGAG( <b>G/A</b> )TGGGGATTACCTT<br>GTTGGTC     | TCGAGACCAACAAGGTGAATCCCCA( <b>C/T</b> )CTCTACTAAAAACACA<br>AAAAGAGCT  |
| rs3129073 | CTATGTCAATCCAAAGTTCT( <b>G/A</b> )TCACCCTATCCATA<br>GCATAC    | TCGAGTATGCTATGGAATAGGGTGA( <b>C/T</b> )AGAACCTTGTGGATGA<br>CATAGAGCT  |
| rs3095271 | CGAGTAGCTGGGATTACAGGC( <b>A/G</b> )CACGCCACCATGC<br>CCAGCTAC  | TCGAGTAGCTGGGCATGGTGGCGTG( <b>T/C</b> )GCCTGTAATCCCAGC<br>TACTCGAGCT  |
| rs29228   | CTACGCCCATCTCGGACAAAA( <b>A/G</b> )CAGAAATGTATGTC<br>TCAGTTC  | TCGAGAAGTGAAGCATACATTTCTG( <b>T/C</b> )TTTTGTCCGAGATGGG<br>CGTAGAGCT  |
| rs3095294 | CGGCCAGCGCCGTGGCTCAC( <b>A/G</b> )CCTGTAATCCCAG<br>CACTGTGC   | TCGAGCACAGTGTGGGATTACAGG( <b>T/C</b> )GTGAGCCACGGCGCT<br>GGGCCGAGCT   |
| rs3129069 | CAGATCACAAGGTCAGGAGAT( <b>T/C</b> )GAGACCATCCTGG<br>CTAAAACC  | TCGAGGTTTTAGCCAGGATGGTCTC( <b>A/G</b> )ATCTCCTGACCTTGTG<br>ATCTGAGCT  |
| rs3130251 | CGCGGTGGCTCACACCTATAA( <b>C/T</b> )CCCCAAACTTTGGG<br>AGGCCGC  | TCGAGCGGCTCCCAAAGTTTTGGG( <b>G/A</b> )TTATAGGTGTGAGCC<br>ACCGCGAGCT   |
| rs3095290 | CCCCAGCACTTTGGGAGGCC( <b>A/G</b> )AGGCCAGCGGATCA<br>CCTGAGGC  | TCGAGCCTCAGGTGATCCGCTGGCCT( <b>T/C</b> )GGCCTCCCAAAGTG<br>CTGGGGAGCT  |
| rs374317  | CAGAAAGGAAAGGAGGCCGGA( <b>T/C</b> )GCGGTGGCTCAC<br>GCCTGTAAC  | TCGAGTTACAGGCGTGAGCCACCGC( <b>A/G</b> )TCCGGCCTCCTTTCC<br>TTCTGAGCT   |
| rs375248  | CGTGAGCCAAGATCGCGCCAC( <b>T/C</b> )GCACTCCAGCCTG<br>GGTGACAC  | TCGAGTGTCAACCAGGCTGGAGTGC( <b>A/G</b> )GTGGCGGATCTTG<br>GCTCACGAGCT   |
| rs3094579 | CGGGTGACAGAGCGAGACTCC( <b>A/G</b> )TCTCAAAAAAAAA<br>AAAAAGAC  | TCGAGTCTTTTTTTTTTTTGGAGA( <b>T/C</b> )GGAGTCTCGCTCTGTCA<br>CCCCGAGCT  |
| rs375984  | CTGAAGGATGCCAGGATGGTG( <b>T/C</b> )GGGAGATGGAGAA<br>AGGCTTTC  | TCGAGAAGACCTTTCTCCATCTCCC( <b>A/G</b> )CACCATCCTGGCATCC<br>TTCAGAGCT  |
| rs376319  | CAGTCCAGGACCTGGACCCCA( <b>T/C</b> )CTCTCTAGCTTA<br>GTCTCCC    | TCGAGGGAGACTAAGCTAGAGAGAG( <b>A/G</b> )TGGGGTCCAGGTCC<br>TGGACTGAGCT  |
| rs2535238 | CTCCCTCAAAGCTGGGCCAC( <b>A/C</b> )GAGTTCAGGGCCCT<br>GGTCACCC  | TCGAGGGTGACCAGGGCCCTGAACTC( <b>T/G</b> )GTGGCCCAGCTTTG<br>AGGGAGAGCT  |
| rs2747421 | CGCCTGGGCTAGGTGTCTGCC( <b>C/G</b> )TCTGTTCTACCCT<br>GCTTCTAC  | TCGAGTAGAAGCAGGGTAGAACAGA( <b>G/C</b> )GGCAGACACCTAGCC<br>CAGGCCGAGCT |
| rs3129063 | CTCAATACATGTAGTAGTTCC( <b>A/C</b> )CTTTATCATGGTTTT<br>GCTTTC  | TCGAGAAAGCAAACCATGATAAAG( <b>T/G</b> )GGAACACTACTACATGTA<br>TTGAGAGCT |
| rs387642  | CCTTTATCATGGTTTTGCTTT( <b>T/C</b> )CAATGCTTCAGTTAC<br>CCATGC  | TCGAGCATGGGTAAGTGAAGCATTG( <b>A/G</b> )AAAGCAAACCATGAT<br>AAAGGAGCT   |
| rs387640  | CGCAGATCATCTGAGGTCAGG( <b>G/A</b> )GTTTCGAGATCAGC<br>CTGGTCAC | TCGAGTGACCAGGCTGATCTCGAAC( <b>C/T</b> )CCTGACCTCAGATGA<br>TCTGCCAGCT  |
| rs3129062 | CGTTGCCATGAGCCAAGACTG( <b>T/C</b> )GCCACTGCACCTCC<br>AGCCTGGC | TCGAGCCAGGCTGGAGTGCAGTGGC( <b>A/G</b> )CAGTCTTGGCTCATG<br>GCAACCGAGCT |
| rs448489  | CTTGCACTCCAGCCAGGAAAA( <b>C/T</b> )GAGAGTGAAACTC<br>CGTCTCAC  | TCGAGTGAGACGGAGTTTCACTCTC( <b>G/A</b> )TTCCCTGGCTGGAG<br>TGCAAGAGCT   |
| rs2747427 | CACCCAAAACCCCTTTATCCAC( <b>G/A</b> )GCAATTCTGAGAAT<br>GATGAGC | TCGAGCTCATCTTCTCAGAATTGC( <b>C/T</b> )GTGGATAAAGGGTTTT<br>GGGTGAGCT   |
| rs2747428 | CACCTTTATCCACAGCAATT( <b>G/C</b> )TGAGAATGATGAGA<br>ATCCCCC   | TCGAGGGGGATTCTCATCTCTCA( <b>C/G</b> )AATTGCTGTGGATAAA<br>GGGTGAGCT    |
| rs417764  | CACAGCAATTCTGAGAATGAT( <b>A/G</b> )AGAATCCCCCTCAC<br>CCCTCAC  | TCGAGTGAGGGGTGAGGGGGATTCT( <b>T/C</b> )ATCATTCTCAGAATT<br>GCTGTGAGCT  |
| rs3129058 | CTTAGTGGGATTCACCTTGT( <b>T/C</b> )GTCACCAACCCTGC<br>TACTCCC   | TCGAGGGAGTAGCAGGGTTGGTGC( <b>A/G</b> )ACAAGGGTGAATCC<br>CACTAAGAGCT   |
| rs2747429 | CGGGCGCTCCTGGCCCTGTCC( <b>C/T</b> )CCGCGCTTAGTTT<br>GTCATTGC  | TCGAGCAATGACAACTAAGCGCGG( <b>G/A</b> )GGACAGGGCCAGGA<br>CGCCCCAGCT    |
| rs416568  | CCGGAGATCGCGCCATTGCAC( <b>A/T</b> )CCAGCCAGGAAAA<br>TGAGAGTC  | TCGAGACTCTCATTCCCTGGCTGG( <b>T/A</b> )GTGCAATGGCGCGAT<br>CTCCGGAGCT   |
| rs365052  | CCCGCGCTTAGTTTGTATTG( <b>C/G</b> )GCGCCCAGATCCG<br>GAACCCCC   | TCGAGGGGGTTCCGGATCTGGGCGC( <b>G/C</b> )CAATGACAACTAAG<br>CGCCGGAGCT   |
| rs2747431 | CTACCTTCCCAGATGCCATC( <b>T/C</b> )GCCAGAATCTTCC<br>TTCTGGC    | TCGAGCCAGAAGGAAATTTCTGGGC( <b>A/G</b> )GATGGGCATCGGGG<br>AAGGTAGAGCT  |
| rs3117295 | CTTCTTTCTATGCCCTTTA( <b>C/T</b> )CTCTAATGTCCCTAT<br>TCTGCC    | TCGAGGCAGAATAGGGACATTAGAG( <b>G/A</b> )TAAAGGGGCATAGAA<br>AGGAAGAGCT  |
| rs7738158 | CCCCGTCTCACTCTCCAAGT( <b>A/G</b> )GCTGGAATCACTG<br>GCGCATGC   | TCGAGCATGCGCCAGTGATTCCAGC( <b>T/C</b> )ACTTGGGAGAGTGAG<br>ACGGGGAGCT  |
| rs3129056 | CCACTGTTTTGGCCTGGAGGT( <b>G/A</b> )TCTCTCCCTAAAG<br>CCAAAAC   | TCGAGTTTTGGCTTTAGGGAAGAGA( <b>C/T</b> )ACCTCCAGGCCAAAAC<br>AGTGGAGCT  |
| rs3129048 | CGCAGACGGGGCTGAACCTGA( <b>A/G</b> )GTCAACCACGCTG<br>AGACGGAC  | TCGAGTCCGTCTCAGCGTGGTTGAC( <b>T/C</b> )TCAGGTTACGCCCG<br>TCTGCCAGCT   |
| rs3129047 | CTGAGGTCAACCACGCTGAGA( <b>T/C</b> )GGAGGTTCTCCT<br>GAGCACCC   | TCGAGGGTGTCTCAGGAGAACCTCC( <b>A/G</b> )TCTCAGCGTGGTTGA<br>CCTCAGAGCT  |
| rs1610588 | CGCCAGAAAACCCATGAATAG( <b>T/C</b> )GTCCTTGGGCTGA<br>CCTATGCC  | TCGAGGCATAGGTGAGCCCAAGGAC( <b>A/G</b> )CTATTGATGGGTTTC<br>TGGGCGAGCT  |
| rs1610589 | CACCTGCTCATCTGCATGGCC( <b>A/G</b> )TGTGCTGACATG<br>GTCAGAAC   | TCGAGTCTGACCATGTCAGGCACA( <b>T/C</b> )GGCCATGCAGATGAG<br>CAGGTGAGCT   |

**Table S13.** RCCX modular structure in 13 reference human cell lines.

| Cell line | RCCX Structure | C4A | C4B | C4L | C4S | TNXA |
|-----------|----------------|-----|-----|-----|-----|------|
| COX       |                | 0   | 2   | 0   | 2   | 0    |
| QBL       | Monomodular    | 2   | 0   | 2   | 0   | 0    |
| MOU       |                | 0   | 2   | 2   | 0   | 0    |
| PGF       |                | 2   | 2   | 4   | 0   | 2    |
| SSTO      |                | 2   | 2   | 4   | 0   | 2    |
| DBB       | Bimodular      | 2   | 1   | 2   | 2   | 2    |
| WT51      |                | 4   | 0   | 4   | 0   | 2    |
| MADURA    |                | 2   | 2   | 0   | 4   | 2    |
| CB6B      | Quadrimodular  | 4   | 4   | 6   | 2   | 6    |
| WT8       |                | 1   | 2   | 3   | 0   | 1    |
| DAUDI     | Heterozygous   | 2   | 1   | 2   | 1   | 1    |
| MANIKA    |                | 2   | 3   | 2   | 3   | 3    |
| HOM       |                | 3   | 2   | 4   | 1   | 3    |
